# Supplementary material
Source: PubMed Central journal article supplement (PMC5360100)
Supplement: NIHMS689609-supplement-Supplemental_data.pdf [file NIHMS689609-supplement-Supplemental_data.pdf]

## Supplemental Data

### Impact of Divalent Metal Ions on Regulation of Adenylyl Cyclase Isoforms by Forskolin Analogs

Miriam Erdorf, Tung-Chung Mou, and Roland Seifert

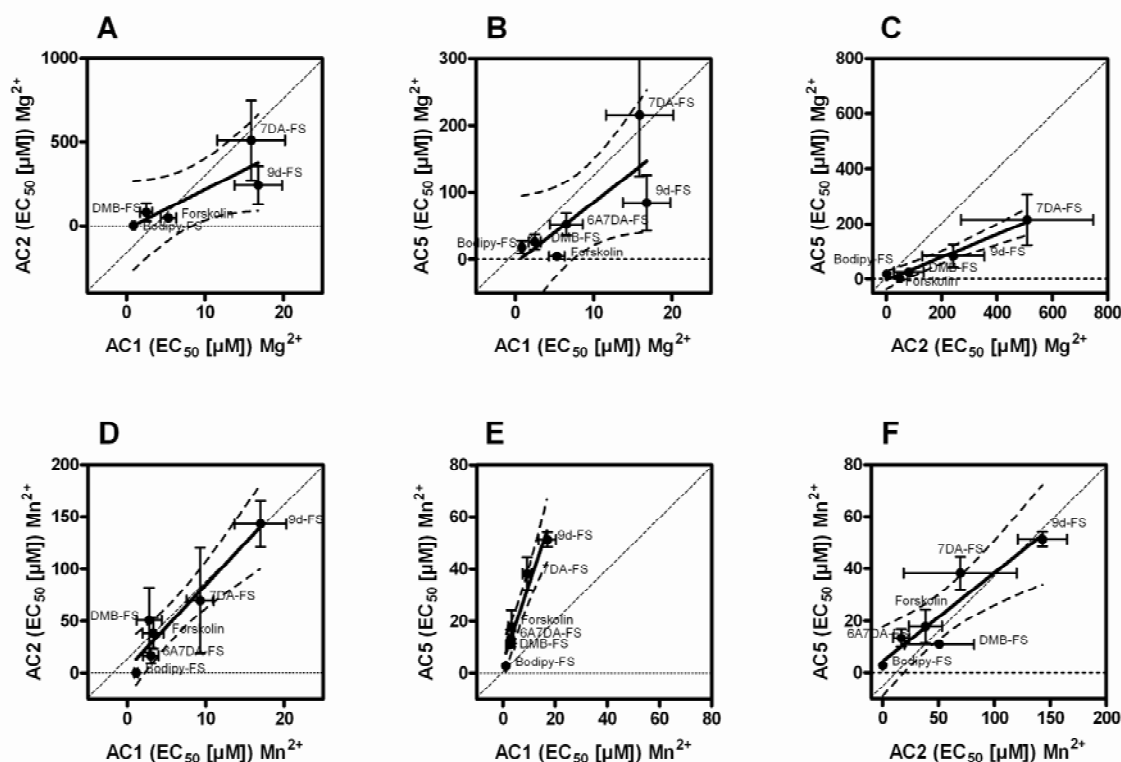

**Fig. S1. Correlation of the potencies of FS analogs on the different AC isoforms.** **A**, correlation of AC1 vs. AC2 in presence of  $Mg^{2+}$  ( $r^2 = 0.73$ ; slope =  $23.4 \pm 8.3$ ;  $p = 0.07$ ). **B**, correlation of AC1 vs. AC5 under  $Mg^{2+}$  conditions ( $r^2 = 0.62$ ; slope =  $9.04 \pm 3.5$ ;  $p = 0.06$ ). **C**, correlation of AC2 with AC5 in presence of  $Mg^{2+}$  ( $r^2 = 0.97$ ; slope =  $0.41 \pm 0.04$ ;  $p = 0.002$ ). **D**, correlation of AC1 vs. AC2 under  $Mn^{2+}$  conditions ( $r^2 = 0.92$ ; slope =  $8.00 \pm 1.2$ ;  $p = 0.003$ ). **E**, correlation of AC1 with AC5 in the presence of  $Mn^{2+}$  ( $r^2 = 0.94$ ; slope =  $3.0 \pm 0.36$ ;  $p = 0.001$ ). **F**, correlation of AC2 and AC5 under  $Mn^{2+}$  conditions ( $r^2 = 0.86$ ; slope =  $0.34 \pm 0.07$ ;  $p = 0.008$ ). Note the different scales of the x- and y-axes in **A**, **B**, **D** and **F**. Comparisons were analyzed by linear regression; the dashed lines indicate 95% confidence intervals. The diagonal dotted line has a slope of 1.0 and represents a theoretical curve for identical values.

In the presence of  $Mg^{2+}$ , correlations of the  $EC_{50}$ -values on ACs 1, 2 and 5 with each other revealed differences in their pharmacological profiles. As shown in Figs. S1A and B, stimulatory potencies on AC1 compared to AC2 and AC5 resulted in very steep slopes of  $23.4 \pm 8.3$  and  $9.04 \pm 3.5$ , respectively and the corresponding correlation coefficients ( $r^2$ ) of 0.73 and 0.62 differ considerably from unity. This indicates remarkable differences in the diterpene profile with lower potencies of FS analogs for AC5 as compared to AC1 and very low potencies at AC2. The correlation of AC2 and

AC5 shown in Fig. S1C, revealed a slope of  $0.41 \pm 0.04$  with an  $r^2$  of 0.97 indicating that FS and the six FS analogs bind only with less than half of the affinity to AC2 than to AC5 in presence of  $Mg^{2+}$ . The influence of  $Mn^{2+}$  revealed isoform-specific patterns of  $EC_{50}$ -values determined for FS and FS analogs (Figs. S1D-F). Consistently for all diterpenes ( $r^2 \sim 1$ ), the stimulatory potencies on AC1 compared to AC2 and AC5 were considerably higher, expressed by slopes of  $8.0 \pm 1.2$  for AC1 vs. AC2 and  $3.0 \pm 0.36$  for AC1 vs. AC5.

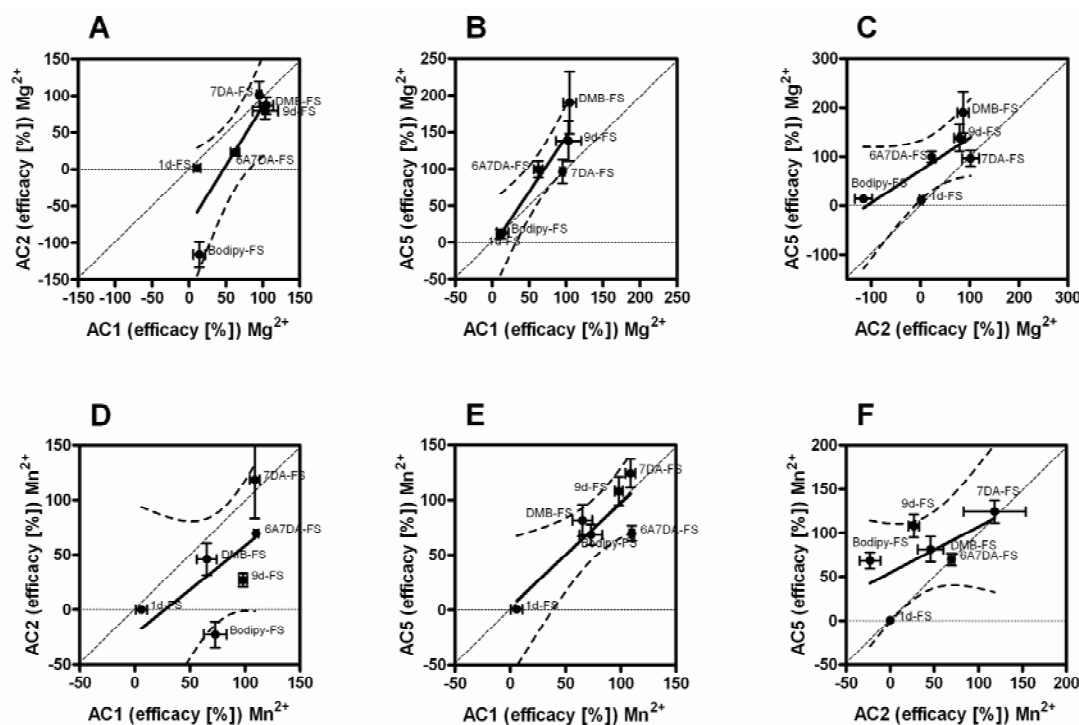

**Fig. S2. Correlation of the efficacies of the diterpenes on each recombinant AC isoform compared to each other.** **A**, correlation of AC1 vs. AC2 in presence of  $Mg^{2+}$  ( $r^2 = 0.75$ ; slope =  $1.61 \pm 0.5$ ;  $p = 0.026$ ). **B**, correlation of AC1 vs. AC5 under  $Mg^{2+}$  conditions ( $r^2 = 0.86$ ; slope =  $1.49 \pm 0.3$ ;  $p = 0.008$ ). **C**, correlation of AC2 with AC5 in presence of  $Mg^{2+}$  ( $r^2 = 0.59$ ; slope =  $0.66 \pm 0.28$ ;  $p = 0.074$ ). **D**, correlation of AC1 vs. AC2 under  $Mn^{2+}$  conditions ( $r^2 = 0.39$ ; slope =  $0.80 \pm 0.50$ ;  $p = 0.19$ ). **E**, correlation of AC1 with AC5 in the presence of  $Mn^{2+}$  ( $r^2 = 0.76$ ; slope =  $0.94 \pm 0.27$ ;  $p = 0.02$ ). **F**, correlation of AC2 and AC5 under  $Mn^{2+}$  conditions ( $r^2 = 0.38$ ; slope =  $0.52 \pm 0.33$ ;  $p = 0.19$ ). Comparisons were analyzed by linear regression; the dashed lines indicate 95% confidence intervals. The diagonal dotted line has a slope of 1.0 and represents a theoretical curve for identical values.

Focusing on the comparison of the efficacies of diterpenes on ACs 1, 2 and 5, no similarities were found under  $Mg^{2+}$  conditions (Figs. S2A-C). Independently of the divalent metal ion, the maximum stimulation of the different ACs by FS analogs did not yield a uniform picture. Some compounds like 7DA-FS or DMB-FS stimulated ACs 1, 2 or 5 more effectively, whereas other compounds, e.g. 6A7DA-FS or BODIPY-FS, yield lower AC activity in some cases, reflected by data points outside the 95% confidence interval. Under  $Mn^{2+}$  conditions, correlations of efficacies of FS analogs on AC1 with AC2 or AC5, respectively, are characterized by slopes close to 1.0, but the correlation coefficients are very low ( $r^2 = 0.39$ ,  $r^2 = 0.76$ ) (Figs. S2D and E).

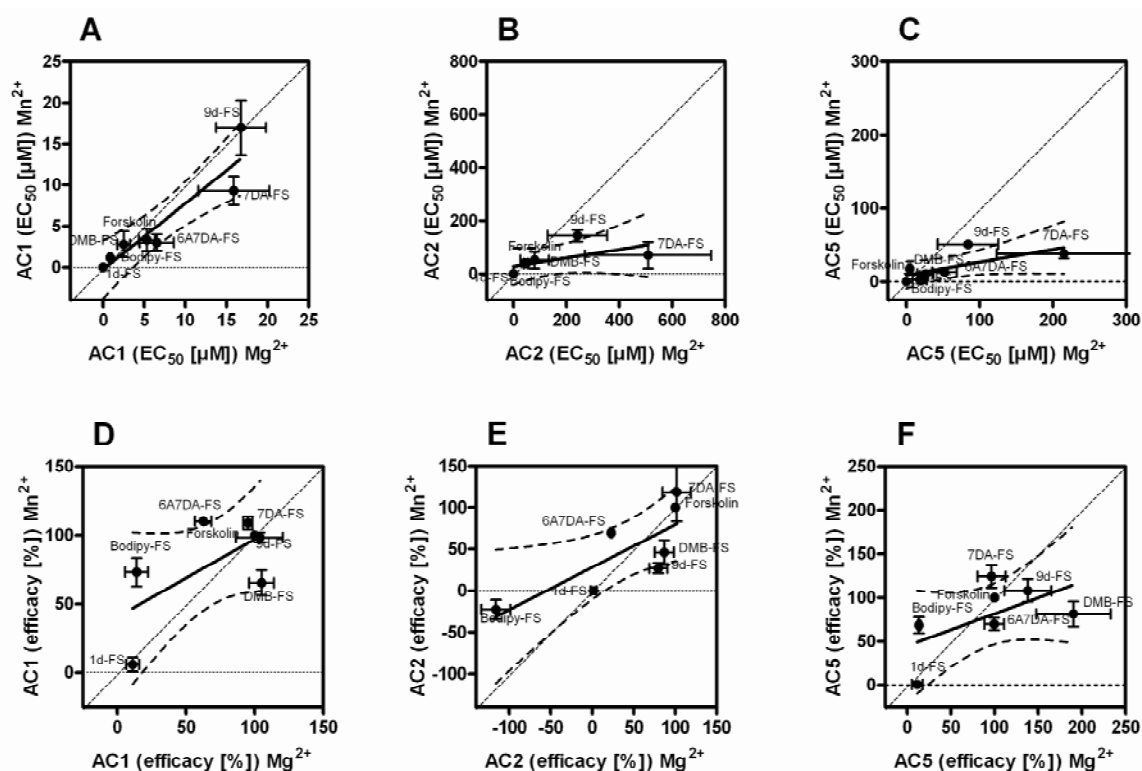

**Fig. S3. Correlation of potencies and efficacies of FS and FS analogs under  $Mg^{2+}$  conditions vs. under  $Mn^{2+}$  conditions.** A-C, correlation of isoform-specific  $EC_{50}$ -values determined in presence of  $Mg^{2+}$  vs. in presence of  $Mn^{2+}$ . D-F, correlation of the efficacies on ACs 1, 2 and 5, respectively,  $Mg^{2+}$  conditions vs.  $Mn^{2+}$  conditions. A,  $r^2 = 0.86$ ; slope =  $0.80 \pm 0.2$ ;  $p = 0.0028$ . B,  $r^2 = 0.36$ ; slope =  $0.16 \pm 0.11$ ;  $p = 0.21$ . C,  $r^2 = 0.49$ ; slope =  $0.17 \pm 0.08$ ;  $p = 0.08$ . D,  $r^2 = 0.41$ ; slope =  $0.56 \pm 0.18$ ;  $p = 0.12$ . E,  $r^2 = 0.61$ ; slope =  $0.51 \pm 0.18$ ;  $p = 0.04$ . F,  $r^2 = 0.34$ ; slope =  $0.37 \pm 0.23$ ;  $p = 0.17$ . Data were analyzed by linear regression; the dashed lines indicate 95% confidence intervals. The diagonal dotted line has a slope of 1.0 and represents a theoretical curve for identical values.

The comparison of the pharmacological parameters of each AC isoform in the presence of  $Mg^{2+}$  with those in presence of  $Mn^{2+}$  showed different AC-sensitivity to divalent cations. Striking effects on the diterpene profile depending on whether  $Mg^{2+}$  or  $Mn^{2+}$  serves the role of cation cofactor were observed for potencies at AC2 and AC5 (Figs. S3B and C). The lowest impact of the cations was determined for the potencies of AC1 ( $r^2 = 0.86$ ; slope =  $0.80 \pm 0.2$ ) (Fig. S3A). Correlations of efficacies in the presence of  $Mg^{2+}$  versus  $Mn^{2+}$  deviated from identity (slope 1.00) as well (Figs. S3D, E and F).

## AC1 C1 domain

|               |                                                                                |     |
|---------------|--------------------------------------------------------------------------------|-----|
| AC1_C1_Human  | TERSQRKAFIQARSCIEDRLRLEDENEKQERLLMSLLPRNVAMEMKEDFLKPPERIFHKI                   | 294 |
| AC1_C1_Mouse  | T.S.....N.....                                                                 | 293 |
| AC1_C1_Bovine | A.R.....N.....                                                                 | 295 |
| AC1_C1_Human  | YIQRHDNVSIL <b>FADIVGFTGLASQCTAQELVKLLNELFGKFD</b> ELATENHCRRIKI <b>LGD</b> CY | 354 |
| AC1_C1_Mouse  | .....                                                                          | 353 |
| AC1_C1_Bovine | .....                                                                          | 357 |
| AC1_C1_Human  | <b>Y</b> CVSGLTQPKTDHAHCCVEMGLDMIDTITSVAEATEVDLNM <b>R</b> VGLHTGRVLCGVVGLRKW  | 414 |
| AC1_C1_Mouse  | .....                                                                          | 413 |
| AC1_C1_Bovine | .....                                                                          | 417 |
| AC1_C1_Human  | QYD <b>VWSNDVT</b> LANVMEAAGLPGKVHITKTTLACLNGDYEVEPGYGHERNSFLKTHNIETF          | 474 |
| AC1_C1_Mouse  | .....H....T..R.....                                                            | 473 |
| AC1_C1_Bovine | .....H....S..K.....                                                            | 477 |
| AC1_C1_Human  | FIVPSHRRKIFPGLILSD <b>IKPAKRMKFKTVCYLLVQLMHC</b> RMFKAEIPFSNVMTCEDDD           | 534 |
| AC1_C1_Mouse  | .....                                                                          | 533 |
| AC1_C1_Bovine | .....                                                                          | 537 |
| AC1_C1_Human  | KRRALRTASEKLRNRSSFSTNVVYTPGTRVNRYSRLLEARQTELEMADLNFFTLKYKH                     | 594 |
| AC1_C1_Mouse  | .....Y.....S.....T.....H                                                       | 593 |
| AC1_C1_Bovine | .....Q.....G.....M.....Q                                                       | 597 |
| AC1_C1_Human  | VEREQKYHQLQDEYFT                                                               | 610 |
| AC1_C1_Mouse  | V...Q.....                                                                     | 609 |
| AC1_C1_Bovine | A...R.....                                                                     | 612 |

## AC1 C2 domain

|               |                                                                                                     |      |
|---------------|-----------------------------------------------------------------------------------------------------|------|
| AC1_C2_Human  | SCALALHARQVDIRLRLDYLWAAQAEEREDMEKVKLDNRRILFNLLPAHVAQHFLMSNP                                         | 854  |
| AC1_C1_Mouse  | ..T.....VR.....D..R....K.....                                                                       | 853  |
| AC1_C1_Bovine | ..T.....VK.....D..K....K.....                                                                       | 857  |
| AC1_C2_Human  | RNMDLYYQSYSQVGMFASIPNF <b>N</b> DFYIELDGNNMGVECLRLLNEIIADFDLMEKDFYK                                 | 914  |
| AC1_C1_Mouse  | .....D.....                                                                                         | 913  |
| AC1_C1_Bovine | .....D.....                                                                                         | 917  |
| AC1_C2_Human  | DI <b>E</b> IK <b>TIG</b> STY <b>MA</b> AVGLAPTSGTKAKKSISSHLSTLADF <del>AIEMFDVLDEIN</del> YQSYNDFV | 974  |
| AC1_C1_Mouse  | .....A..R...S....C.....D.....                                                                       | 973  |
| AC1_C1_Bovine | .....A..K...C....S.....E.....                                                                       | 977  |
| AC1_C2_Human  | LRVGINVGPV <b>VAGVIGARRPQYDIW</b> GN <b>TVNVA</b> SRMDSTGVQGRIQVTEE <b>VHRLLRCPYH</b>               | 1034 |
| AC1_C1_Mouse  | .....K.CS.Q                                                                                         | 1033 |
| AC1_C1_Bovine | .....R.GS.R                                                                                         | 1037 |
| AC1_C2_Human  | <b>FVCRGKVS</b> V <b>KGK</b> GEMLT <del>YFLEGR</del> TDGNGSQIRSLGLDRKMCPFGRAGLQGR----RPPVC          | 1094 |
| AC1_C1_Mouse  | .....S.HG.TFRLE.R.C.Y..G.G.A.---R..LC                                                               | 1093 |
| AC1_C1_Bovine | .....G.QT.SLNSE.K.Y.F..A.L.T.LAAGH..VP                                                              | 1097 |
| AC1_C2_Human  | PMPGVSVRAG-----LPPHSPGQYLPSAAAGKEA                                                                  | 1119 |
| AC1_C1_Mouse  | .AA.PP.RP.-----P.APTS.Y.SST.A....                                                                   | 1118 |
| AC1_C1_Bovine | .AA.LP.GA.PGALQSG.A.GPPG.H.PPG.S....                                                                | 1134 |

## AC2 C1 domain

|              |                                                              |     |
|--------------|--------------------------------------------------------------|-----|
| AC2_C1_Human | HKHLMELALQQTYQDTCNCIKSRIKLEFEKRQQERLLLSLLPAHIAMEMKAEIIQRLQGP | 267 |
| AC2_C1_Mouse | .....R.....                                                  | 266 |
| AC2_C1_Rat   | .....R.....                                                  | 266 |
| AC2_C1_Human | KAGQMENTNMFHNLYVKRHTNVSILYADIVGFTRLASDCSPGELVHMLNELFGKFDQIAK | 327 |
| AC2_C1_Mouse | .....                                                        | 326 |
| AC2_C1_Rat   | .....                                                        | 326 |
| AC2_C1_Human | ENECMRIKILGDCYCVSGLPISLPNHAKNCVKMGLDMCEAIKKVRDATGVDINMRVGVH  | 387 |
| AC2_C1_Mouse | .....                                                        | 386 |
| AC2_C1_Rat   | .....                                                        | 386 |
| AC2_C1_Human | SGNVLCGVIGLQKWQYDVVSHDVTLANHMEAGVPGRVHISSVTLEHLNGAYKVEEGDGD  | 447 |
| AC2_C1_Mouse | .....E                                                       | 446 |
| AC2_C1_Rat   | .....E                                                       | 446 |
| AC2_C1_Human | IRDPLYLQHLVKTYFVINPKGERRSPQHLFRPRHTLDGAKMRASVRMTRYLESWGAAPF  | 507 |
| AC2_C1_Mouse | .....                                                        | 506 |
| AC2_C1_Rat   | .....                                                        | 506 |
| AC2_C1_Human | AHLHHRDSMTTENGKISTTDVPMGQHNFNQRTLRTKSQQKRFEELNERMIQAIDGINAQ  | 567 |
| AC2_C1_Mouse | .....                                                        | 566 |
| AC2_C1_Rat   | .....                                                        | 566 |
| AC2_C1_Human | KQWLKSEDIQRISLLFYNKVLEKEYRATALPAFK                           | 601 |
| AC2_C1_Mouse | .....F...NI.....                                             | 600 |
| AC2_C1_Rat   | .....L...NI.....                                             | 600 |

## AC2 C2 domain

|              |                                                                 |      |
|--------------|-----------------------------------------------------------------|------|
| AC2_C2_Human | RQNEYCYCRDLFLWKNKFKKEREEIETMENLNRVLEENLPAHVAEHFLARSLKNEELYHQ    | 881  |
| AC2_C2_Mouse | ..S.....                                                        | 880  |
| AC2_C2_Rat   | ..S.....                                                        | 880  |
| AC2_C2_Human | SYDCVCMVFASIPDFKEFYTESDVNKEGLECLRLLNEIIADFDDLLSKPKFSGVEKIKTI    | 941  |
| AC2_C2_Mouse | .....                                                           | 940  |
| AC2_C2_Rat   | .....                                                           | 940  |
| AC2_C2_Human | GSTYMAATGLSAVPSQEHSQEPERQYMHIGTMVEFALVVGKLDAINKHSFNDFKLRVGI     | 1001 |
| AC2_C2_Mouse | .....V...A.....Y.....                                           | 1000 |
| AC2_C2_Rat   | .....I...A.....Y.....                                           | 1000 |
| AC2_C2_Human | NHGPVIAAGVIGAQKPQYDIWGNTVNVASRMDSTGVLDKIQVTEETSLLVQLQTLGYTCTCRG | 1061 |
| AC2_C2_Mouse | .....I.....                                                     | 1060 |
| AC2_C2_Rat   | .....I.....                                                     | 1060 |
| AC2_C2_Human | IINVKKGKGLKTYFVNTEMSRSLQSNSVAS                                  | 1091 |
| AC2_C2_Mouse | .....L..                                                        | 1090 |
| AC2_C2_Rat   | .....L..                                                        | 1090 |

## AC5 C1 domain

|               |                                                               |           |
|---------------|---------------------------------------------------------------|-----------|
| AC5_C1_Human  | CTHYPAEVSQRQAFQETRECIQARLHSQRENQQQERLLLSVLP RHVAMEMKADINAKQED | 455       |
| AC5_C1_Mouse  | C.....                                                        | 455       |
| AC5_C1_Rat    | C.....                                                        | 457       |
| AC5_C1_Dog    | C.....                                                        | 454 (376) |
| AC5_C1_Rabbit | -.....                                                        | 457       |
| AC5_C1_Human  | MMFHKIYIQKHDNVSILFADIEGFTSLASQCTAQELVMTLNELEFARFDKLAENHCLRIK  | 515       |
| AC5_C1_Mouse  | .....                                                         | 515       |
| AC5_C1_Rat    | .....                                                         | 517       |
| AC5_C1_Dog    | .....                                                         | 514 (436) |
| AC5_C1_Rabbit | .....                                                         | 517       |
| AC5_C1_Human  | ILGDCYCVSGLPEARADHAHCCVEMGMDIEAISLVREVTGVNVNMRVGIHSGRVHCGV    | 575       |
| AC5_C1_Mouse  | .....L.....                                                   | 574       |
| AC5_C1_Rat    | .....S.....                                                   | 575       |
| AC5_C1_Dog    | .....L.....                                                   | 577 (496) |
| AC5_C1_Rabbit | .....L.....                                                   | 577       |
| AC5_C1_Human  | LGLRKWQFDVWSNDVTLANHMEAGGKAGRIHITKATLNLYLNGDYEVPEPGCGDRNAYLKE | 635       |
| AC5_C1_Mouse  | .....N.....E.....                                             | 635       |
| AC5_C1_Rat    | .....N.....E.....                                             | 634       |
| AC5_C1_Dog    | .....S.....E.....                                             | 637 (556) |
| AC5_C1_Rabbit | .....N.....E.....                                             | 637       |
| AC5_C1_Human  | HSIETFLILSCTQKRKEEKAMIAKMNRQRTNSIGHNPPHWGAERPFYNHLGGNQVSKEMK  | 695       |
| AC5_C1_Mouse  | .....R.....                                                   | 695       |
| AC5_C1_Rat    | .....R.....                                                   | 697       |
| AC5_C1_Dog    | .....R.....                                                   | 694 (616) |
| AC5_C1_Rabbit | .....R.....                                                   | 697       |
| AC5_C1_Human  | RMGFEDPKDKNAQESANPEDEVDFLGRAIDARSIDRLRSEHVRKFLLTFRFPDLEKKYS   | 755       |
| AC5_C1_Mouse  | .....A.....K.....                                             | 755       |
| AC5_C1_Rat    | .....A.....K.....                                             | 757       |
| AC5_C1_Dog    | .....A.....K.....                                             | 754 (676) |
| AC5_C1_Rabbit | .....T.....R.....                                             | 757       |
| AC5_C1_Human  | KQVDDRF 763                                                   |           |
| AC5_C1_Mouse  | ..... 763                                                     |           |
| AC5_C1_Rat    | ..... 765                                                     |           |
| AC5_C1_Dog    | ..... 762 (684)                                               |           |
| AC5_C1_Rabbit | ..... 765                                                     |           |

## AC5 C2 domain

|               |                                                                           |      |
|---------------|---------------------------------------------------------------------------|------|
| AC5_C2_Human  | -AQQVESTARLDLFLWKLQATEEKEEMEELQAYNRLLHNLPKDVAAHFLARERRNDELY               | 1065 |
| AC5_C2_Mouse  | .....                                                                     | 1066 |
| AC5_C2_Rat    | .....                                                                     | 1066 |
| AC5_C2_Dog    | .....                                                                     | 1069 |
| AC5_C2_Rabbit | H.....                                                                    | 1067 |
| AC5_C2_Human  | YQSCECVAVMFASIANFSEFYVELEANNEGVECLRLLNEIIADFDEIISED <del>RFRQLEKIK</del>  | 1125 |
| AC5_C2_Mouse  | .....L.....                                                               | 1126 |
| AC5_C2_Rat    | .....L.....                                                               | 1126 |
| AC5_C2_Dog    | .....V.....                                                               | 1129 |
| AC5_C2_Rabbit | .....L.....                                                               | 1127 |
| AC5_C2_Human  | TIGSTYMAASGLNDSTYDKVGKTHIKALADFAMKLMQMKYINEHSFNNFQMKIGLNIGP               | 1185 |
| AC5_C2_Mouse  | .....A.....I.....                                                         | 1186 |
| AC5_C2_Rat    | .....A.....L.....                                                         | 1186 |
| AC5_C2_Dog    | .....V.....L.....                                                         | 1189 |
| AC5_C2_Rabbit | .....V.....L.....                                                         | 1187 |
| AC5_C2_Human  | VVAGVIGARKPOYDIWGN <del>TVNVA</del> SRMDSTGVPDRIQVTTDMYQVLAANTYQLECRGVVKV | 1245 |
| AC5_C2_Mouse  | .....                                                                     | 1246 |
| AC5_C2_Rat    | .....                                                                     | 1246 |
| AC5_C2_Dog    | .....                                                                     | 1249 |
| AC5_C2_Rabbit | .....                                                                     | 1247 |
| AC5_C1_Human  | KGKGEMMTYFLNGGPPLS                                                        | 1257 |
| AC5_C1_Mouse  | .....                                                                     | 1257 |
| AC5_C1_Rat    | .....                                                                     | 1257 |
| AC5_C1_Dog    | .....                                                                     | 1257 |
| AC5_C1_Rabbit | .....                                                                     | 1258 |

**Fig. S4. Multiple sequence alignment of the amino acid sequences of the C1 and C3 domains of ACs 1, 2 and 5 from various species.** The amino acid position of each AC is shown at the end of each line, and the residue numbers for the C1 domain of AC5 are indicated in parentheses. *Red* amino acid symbols indicate residues that directly interact with forskolin. *Orange* amino acid symbols represent the region interacting with the N-methylantraniloyl group of AC inhibitors. Amino acids underlined in *blue* correspond to residues interacting with metal ions and the substrate ATP.

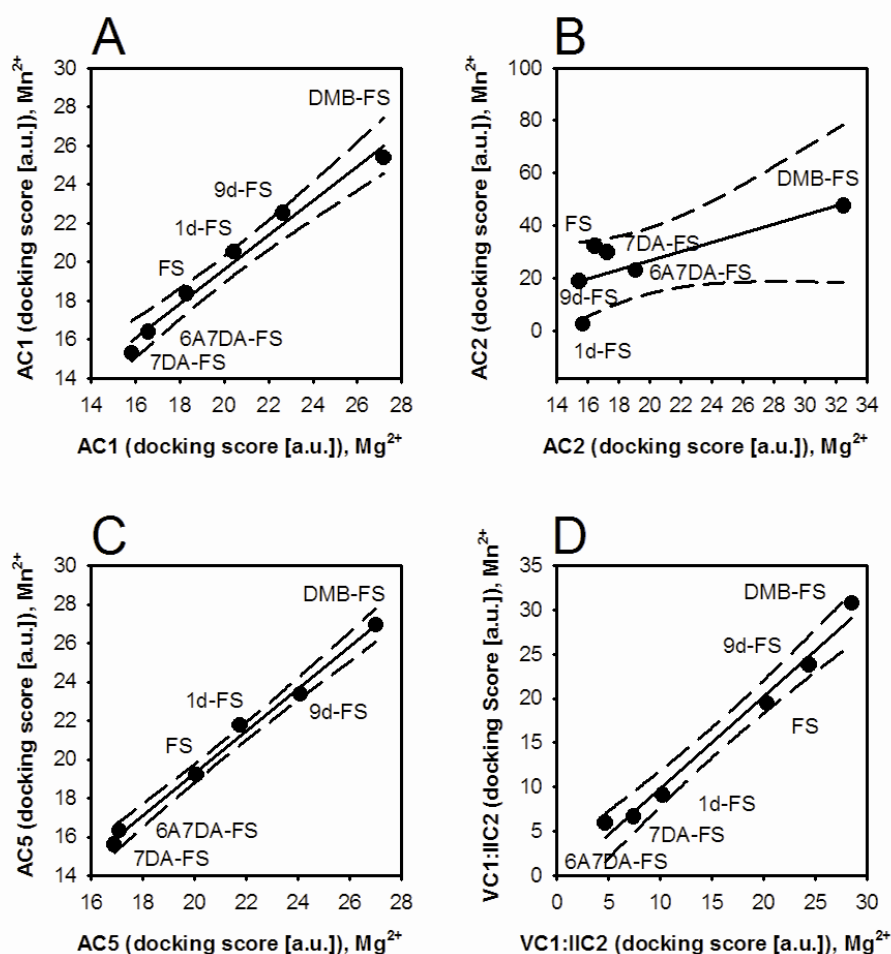

**Fig. S5. Correlation of the docking profiles of diterpenes to mAC isoforms and VC1:ILC2 under Mg<sup>2+</sup> conditions vs. Mn<sup>2+</sup> conditions. A-C**, correlation of docking scores for mAC isoform models 1, 2 and 5 in the presence of Mg<sup>2+</sup> vs. Mn<sup>2+</sup>. **D**, correlation of docking scores for crystal structure of VC1:ILC2 complex in the presence of Mg<sup>2+</sup> vs. Mn<sup>2+</sup>. **A**,  $r^2 = 0.98$ ; slope =  $0.89 \pm 0.06$ . **B**,  $r^2 = 0.57$ ; slope =  $1.74 \pm 0.8$ . **C**,  $r^2 = 0.99$ ; slope =  $1.09 \pm 0.04$ . **D**,  $r^2 = 0.98$ ; slope =  $1.03 \pm 0.07$ . Data were analyzed by linear regression; the dashed lines indicate 95% confidence intervals. a.u.; arbitrary unit.
